Title : PEEP INDUCED  $P_{paw}-P_{1a}$  GRADIENT: FUNCTION OF ABSOLUTE  $P_{1a}$

Authors : I. Johansen, M.D. and J. L. Benumof, M.D.

Affiliation: Anesthesia Research Laboratory, University of California, San Diego  
La Jolla, California 92093

**Introduction.** Pulmonary arterial (PA) wedge pressure ( $P_{paw}$ ) is considered an accurate reflection of left atrial (LA) pressure ( $P_{1a}$ ) provided there is a continuous column of fluid (Zone III,  $P_{pa} > P_{1a} > P_A$ ) between the PA catheter tip and the LA. Positive end-expiratory pressure (PEEP) can intermittently collapse (Zone II,  $P_{pa} > P_A > P_{1a}$ ) and perhaps continuously collapse (Zone I,  $P_A > P_{pa} > P_{1a}$ ) this column of fluid depending on the relative magnitude of  $P_{1a}$ ,  $P_{pa}$  and PEEP and the vertical hydrostatic gradient between the PA catheter tip and the LA. It has previously been shown that with a PA catheter tip positioned vertically above the LA and with a normal  $P_{1a}$  the application of PEEP 15 torr caused a significant gradient between  $P_{paw}$  and  $P_{1a}$ . In theory, but not proven, increasing  $P_{1a}$  should prevent PEEP from causing a gradient between  $P_{paw}$  and  $P_{1a}$ . The purpose of this experiment was to systematically test this hypothesis.

**Methods.** Mongrel dogs were anesthetized with pentobarbital 25 mg/kg i.v., tracheally intubated, paralyzed with pancuronium 0.1 ml/kg i.v. and mechanically ventilated with 100%  $O_2$ , tidal volume 15 ml/kg and ventilatory rate so that end-tidal  $CO_2=5\%$ . In the right lateral decubitus position and following a left thoracotomy, cardiac output ( $Q_t$ ) was continuously measured electromagnetically, and  $P_{1a}$  was measured with a catheter placed via the LA appendage. A transcutaneously passed Swan-Ganz catheter was guided from within the chest to a location above the LA and was used to measure  $P_{pa}$  and  $P_{paw}$ . All vascular pressures were always recorded at end expiration. Two methods were used to increase  $P_{1a}$ : (1) In 6 dogs a second catheter with an inflatable balloon at the tip was inserted into the LA, and  $P_{1a}$  was increased by LA balloon inflation; (2) in 6 dogs  $P_{1a}$  was increased by dextran infusion. The experimental sequence consisted of measuring  $P_{paw}$  and  $P_{1a}$  at PEEP 0, 5, 10 and 15 torr during controlled mechanical ventilation when  $P_{1a}=6$  torr and when  $P_{1a}=25$  torr. The results are expressed as mean  $\pm$ SE and were analyzed by paired t analysis with  $p<0.01$  considered significant.

**Results.** Table 1 shows that LA balloon inflation increased  $P_{1a}$  but decreased  $Q_t$ , whereas Table 2 shows that dextran infusion increased both  $P_{1a}$  and  $Q_t$ . In both groups, at normal  $P_{1a}$ , the gradient  $P(paw-1a)$  was increased significantly at PEEP 10 and 15 torr. In both groups, at high  $P_{1a}$ ,  $P(paw-1a)$  did not change significantly at any PEEP level except for a 2 torr gradient at PEEP 15 torr in the dextran group.

Table 1:  $P_{paw}$  and  $P_{1a}$  as a function of LA balloon inflation ( $\uparrow P_{1a}$ )

| PEEP<br>torr | Control          |                   |                | LA Balloon       |                   |                |
|--------------|------------------|-------------------|----------------|------------------|-------------------|----------------|
|              | $P_{1a}$<br>torr | $P_{paw}$<br>torr | $Q_t$<br>L/min | $P_{1a}$<br>torr | $P_{paw}$<br>torr | $Q_t$<br>L/min |
| 0            | 6 $\pm$ 0.7      | 8 $\pm$ 1.0       | 3.0 $\pm$ 0.4  | 28 $\pm$ 0.8     | 28 $\pm$ 0.7      | 1.6 $\pm$ 0.2  |
| 5            | 7 $\pm$ 0.8      | 9 $\pm$ 1.0*      | 2.9 $\pm$ 0.5  | 25 $\pm$ 2.2     | 25 $\pm$ 1.8      | 1.7 $\pm$ 0.2  |
| 10           | 8 $\pm$ 0.9      | 12 $\pm$ 1.2*     | 2.4 $\pm$ 0.4  | 25 $\pm$ 1.5     | 26 $\pm$ 1.2      | 1.5 $\pm$ 0.2  |
| 15           | 9 $\pm$ 0.6      | 19 $\pm$ 1.4*     | 1.4 $\pm$ 0.2  | 26 $\pm$ 1.1     | 26 $\pm$ 0.9      | 1.2 $\pm$ 0.1  |

\*  $p<0.01$  significant from  $P_{1a}$

†  $p<0.01$  significant from previous PEEP

Table 2:  $P_{paw}$  and  $P_{1a}$  as a function of dextran infusion ( $\uparrow P_{1a}$ )

| PEEP<br>torr | Control          |                   |                | Dextran          |                   |                |
|--------------|------------------|-------------------|----------------|------------------|-------------------|----------------|
|              | $P_{1a}$<br>torr | $P_{paw}$<br>torr | $Q_t$<br>L/min | $P_{1a}$<br>torr | $P_{paw}$<br>torr | $Q_t$<br>L/min |
| 0            | 8 $\pm$ 1.8      | 9 $\pm$ 1.8       | 1.2 $\pm$ 0.1  | 21 $\pm$ 1.8     | 22 $\pm$ 2.0      | 3.2 $\pm$ 0.6  |
| 5            | 9 $\pm$ 1.6      | 10 $\pm$ 1.1      | 1.1 $\pm$ 0.1  | 21 $\pm$ 1.3     | 21 $\pm$ 1.4      | 3.3 $\pm$ 0.7  |
| 10           | 9 $\pm$ 1.3      | 14 $\pm$ 0.2*     | 1.1 $\pm$ 0.1  | 19 $\pm$ 1.3     | 19 $\pm$ 1.3      | 2.8 $\pm$ 0.6  |
| 15           | 10 $\pm$ 1.3     | 17 $\pm$ 0.1*     | 0.6 $\pm$ 0.1  | 18 $\pm$ 1.6     | 20 $\pm$ 1.6*     | 2.2 $\pm$ 0.4  |

\*  $p<0.01$  significant from  $P_{1a}$

The graph demonstrates that with increasing PEEP levels a significant difference between  $P_{paw}$  and  $P_{1a}$  occur only at normal  $P_{1a}$ .

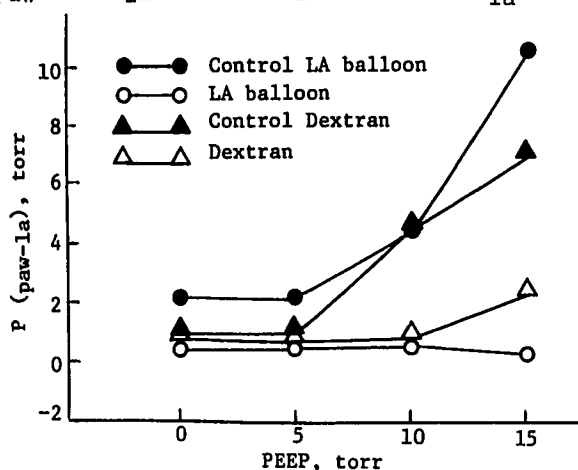

**Discussion.** These results are important for two reasons. First they indicate that when  $P_{1a}$  is increased, the lung remains in Zone III despite an increase in PEEP from 0 to 15 torr and therefore the  $P_{paw}$  remains an accurate reflection of  $P_{1a}$ . Second the effects of several of the conditions known to increase the clinical confidence in the  $P_{paw}$  as an accurate reflection of  $P_{1a}$  may be additive. These clinical conditions include non-compliant lungs, spontaneous ventilation, PA catheter position below the LA and now presently demonstrated increased  $P_{1a}$ .
